# Supplementary figures and images for: Predictive value of plasma ephrinB2 levels for amputation risk following endovascular revascularization in peripheral artery disease
Source: PeerJ journal article supplement (doi:10.7717/peerj.17531), 2024-06-05

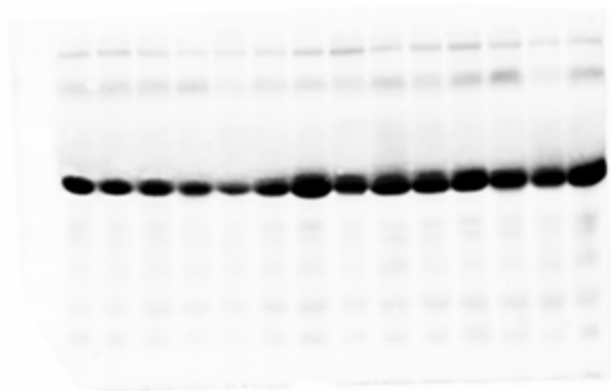

ephrinB2 55kd

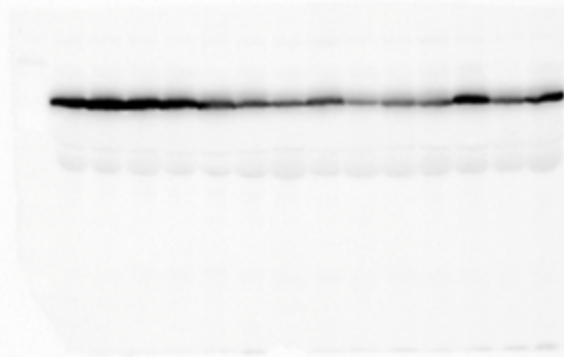

Transferrin 78kd

Supplement: Supplementary_1.zip [file Supplementary_1.zip]
